# Supplementary material for: Nature and evolution of Pd catalysts supported on activated carbon fibers during the catalytic reduction of bromate in water
Source: Royal Society of Chemistry journal article supplement (doi:10.1039/d0cy00606h), 2020-01-01
Supplement: d0cy00606h1.pdf [file d0cy00606h1.pdf]

## Supplementary Information

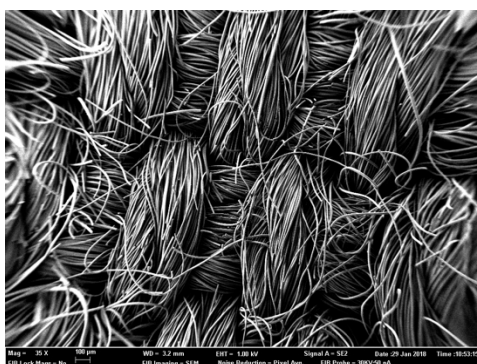

**Figure S1:** FESEM image of the ACF cloth.

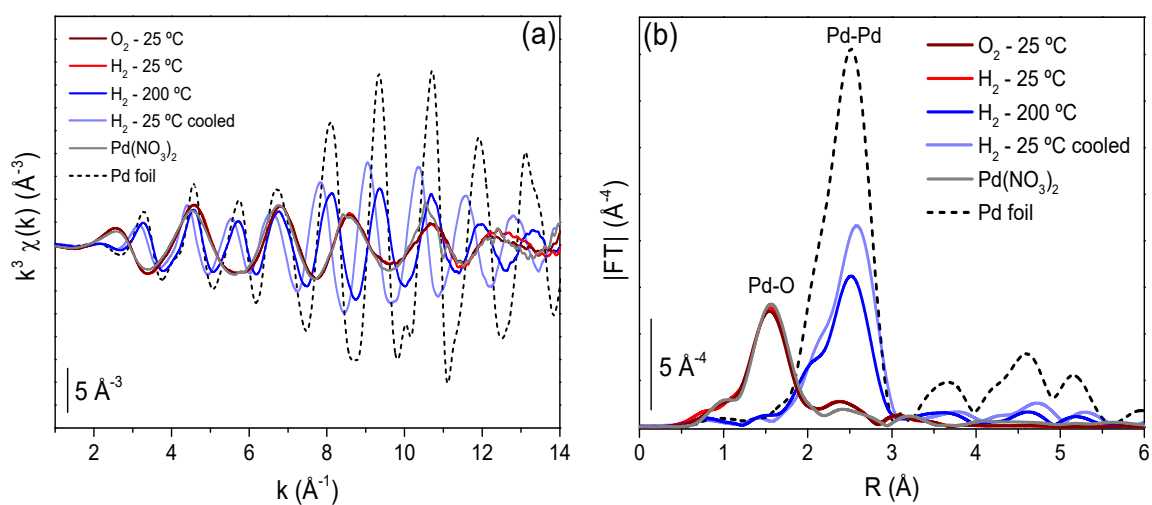

**Figure S2.**  $k^3$ -weighted, phase-uncorrected  $k^3 \chi(k)$  functions (a) and  $|FT|$  of the  $k^3$ -weighted EXAFS spectra (b) of 5% Pd/ACF and Pd-references during catalyst preparation

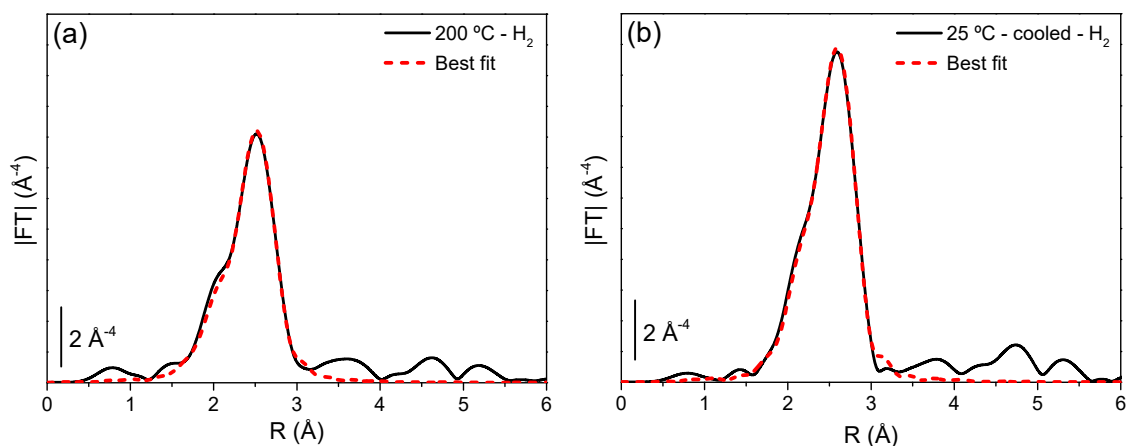

**Figure S3:** Experimental (black full line)  $|FT|$  of the  $k^3$ -weighted  $\chi(k)$  function spectra and best fit (dashed red line) of 5% Pd-ACF during reduction in  $\text{H}_2$  at 200 °C (a) and after reduction at 25 °C (b).

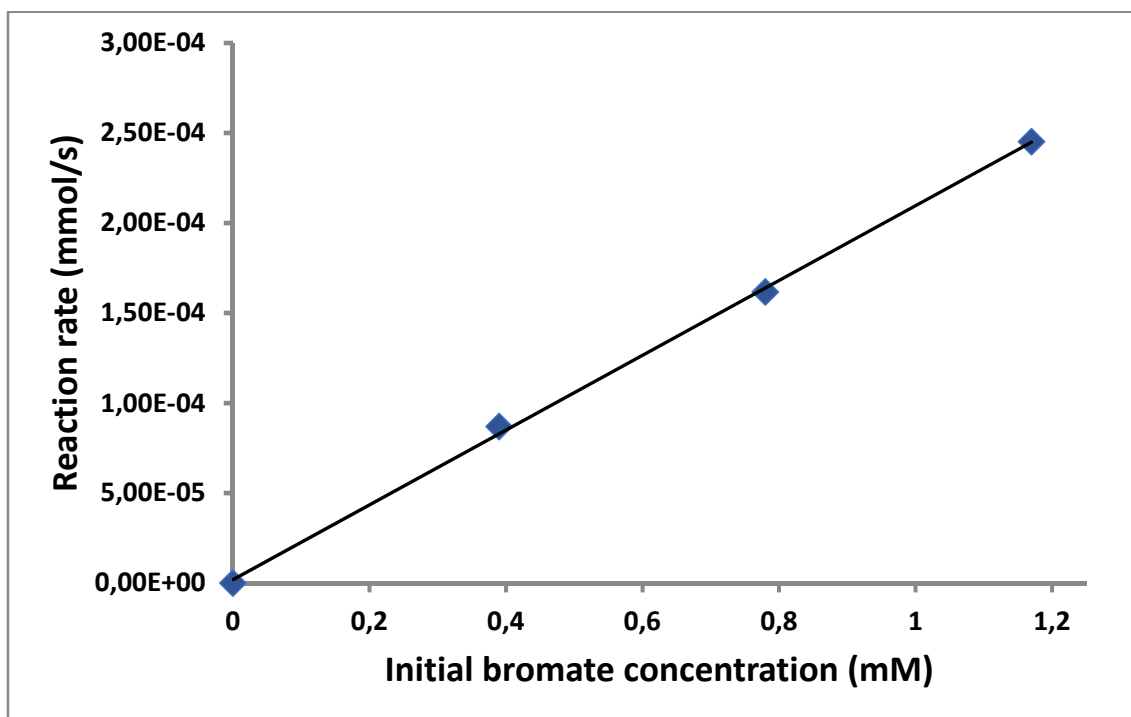

**Figure S4.** Reaction rate (expressed as mmol of reacted bromates per second) at different initial bromate concentration (0.6 L, 0.5 g of 1wt.%Pd/ACF catalyst, RT, atmospheric pressure).

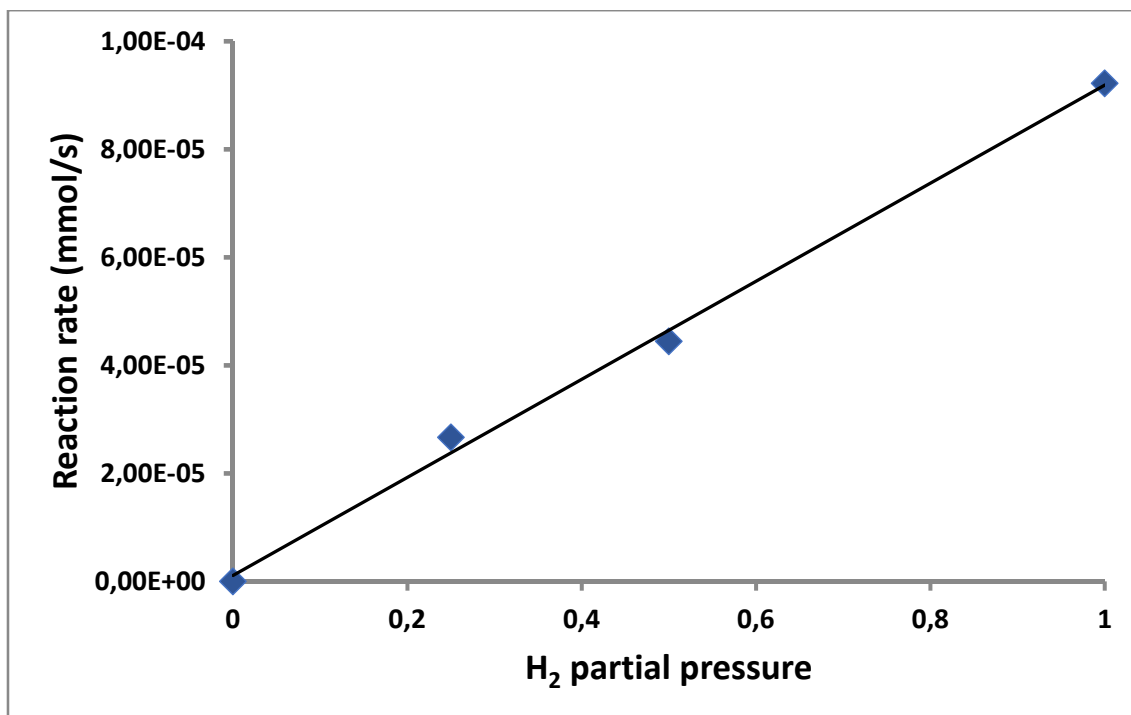

**Figure S5.** Reaction rate (expressed as mmol of reacted bromates per second) at different hydrogen partial pressure (0.6 L, 50 ppm of BrO<sub>3</sub><sup>-</sup>, 0.5 g of 1wt.%Pd/ACF catalyst, RT, atmospheric pressure).

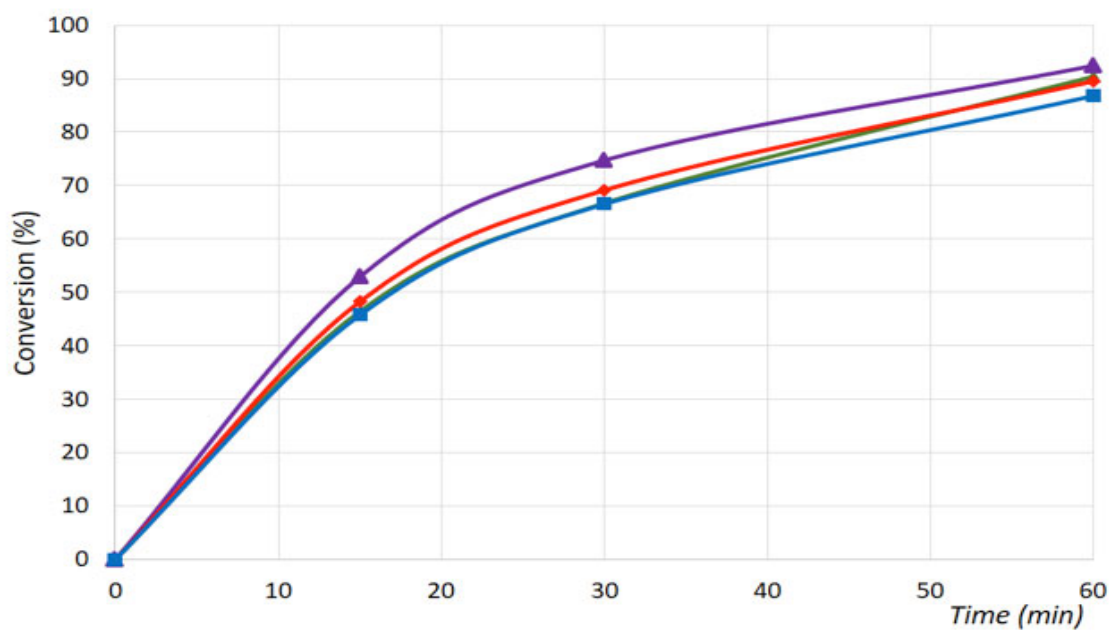

**Figure S6.** Stability of the catalysts 1wt.%Pd/ACF after successive reactions: 1<sup>st</sup> use (♦), 2<sup>nd</sup> use (▲), 3<sup>rd</sup> use (●), 4<sup>th</sup> use (■), (0.6L, 50 ppm of BrO<sub>3</sub><sup>-</sup>, 0.5 g catalyst, RT, atmospheric pressure)
